# Supplementary material for: Double-bond elucidation for arsagermene with a tricoordinate germanium center: a theoretical survey
Source: Royal Society of Chemistry journal article supplement (doi:10.1039/c9nj03091c), 2019-01-01
Supplement: c9nj03091c1.pdf [file c9nj03091c1.pdf]

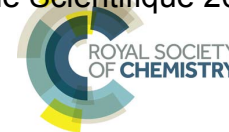

Cite this: DOI: 10.1039/xxxxxxxxxx

## SI: The Double-Bond Elucidation for the Arsagermene with a Tricoordinate Germanium Center: A Theoretical Survey

Glauccio Régis Nagurniak,<sup>\*a</sup> Carina de Souza Peraça,<sup>a</sup> Renato Pereira Orenha,<sup>b</sup> Renato Luis Tame Parreira,<sup>b</sup> and Maurício Jeomar Piotrowski<sup>a</sup>

### 1 GEOMETRIC DETAILS

All systems presented in our work are local minimum configurations in the potential energy surface, not showing any imaginary frequencies. The thermodynamic ( $\Delta G$ ,  $\Delta H$ , and ZPE) parameters are shown at the bottom of xyz matrix.

#### (SiH<sub>3</sub>)<sub>2</sub>GeAsPh

Ge -1.808616575 1.109562530 -0.067368724  
Si -2.770006395 0.804967576 2.099094595  
Si -3.176273565 1.081261350 -2.019125206  
H -4.037898444 0.027101904 1.946118974  
H -3.101883021 2.116219649 2.730221518  
H -1.818394154 0.051428709 2.961896455  
H -2.312311295 1.245846722 -3.224114135  
H -4.174719049 2.192102177 -1.971453985  
H -3.918671397 -0.211892069 -2.111478462  
As 0.434543688 1.390953474 -0.275857122  
C 0.730435328 1.385576145 1.677541279  
C 1.437122012 0.327084918 2.268700509  
C 0.238719806 2.416333444 2.495483431  
C 0.425927254 2.373179008 3.879584981  
C 1.109903630 1.303977773 4.462327575  
C 1.618661407 0.283991794 3.652963178  
H 1.828698622 -0.479200679 1.646694577  
H 2.155674320 -0.552612757 4.101521325  
H 0.031018656 3.176025727 4.503107149  
H 1.249955444 1.266611193 5.542695176  
H -0.296254275 3.253942411 2.046524911  
 $\Delta G = -5127.79097650$  Eh  
 $\Delta H = -5127.73464403$  Eh  
ZPE = 0.13719580 Eh

#### (OCH<sub>3</sub>)<sub>2</sub>GeAsOCH<sub>3</sub>

Ge -2.040779644 0.749990514 -0.213929469

O -2.952020864 1.466292658 1.145376389  
O -3.164787646 0.864424868 -1.614533603  
C -4.313911438 1.898691231 0.974778282  
C -2.682526762 0.427433702 -2.894167271  
H -4.624029804 2.331789888 1.934218559  
H -4.976500164 1.056658001 0.728297635  
H -4.402396494 2.658830774 0.185715108  
H -3.505764964 0.547733618 -3.609899666  
H -2.382932177 -0.632777076 -2.877156019  
H -1.826955643 1.034658865 -3.231751371  
As 0.227205717 0.188866491 -0.332285263  
O 0.677689206 0.453047274 1.414322233  
C 0.591124943 1.780614132 1.942786917  
H 1.138455224 1.781383647 2.895891579  
H -0.460270255 2.058195774 2.131661731  
H 1.037814766 2.524038639 1.263596228  
 $\Delta G = -4658.94310031$  Eh  
 $\Delta H = -4658.88785028$  Eh  
ZPE = 0.12202786 Eh

#### (CH<sub>3</sub>)<sub>2</sub>GeAsCH<sub>3</sub>

Ge -2.080640000 0.906992000 -0.161580000  
C -2.997629000 0.825361000 1.585523000  
C -3.367228000 0.704601000 -1.640527000  
H -3.744605000 1.627820000 1.641874000  
H -2.285942000 0.937300000 2.410113000  
H -3.512391000 -0.139478000 1.681350000  
H -2.842312000 0.751302000 -2.600791000  
H -4.116223000 1.506096000 -1.597849000  
H -3.885049000 -0.259839000 -1.557338000  
As 0.117868000 1.187524000 -0.573339000  
C 0.779629000 1.316231000 1.324233000  
H 1.510432000 0.515263000 1.486986000  
H -0.019278000 1.228907000 2.067097000  
H 1.280137000 2.283946000 1.447246000  
 $\Delta G = -4433.16932230$  Eh  
 $\Delta H = -4433.12228089$  Eh  
ZPE = 0.10709421 Eh

#### H<sub>2</sub>GeAsH

<sup>a</sup> Department of Physics, Federal University of Pelotas, PO Box 354, 96010-900, Pelotas, RS, Brazil.

\* E-mail: glaucio.grn@gmail.com; Tel: +55 48 9 9655 2134

<sup>b</sup> Núcleo de Pesquisas em Ciências Exatas e Tecnológicas, Universidade de Franca, Franca, SP, Brazil.

Ge -2.16955836887685 0.92034661120312 -0.05910287638695  
H -2.97547621706058 1.03025729186930 1.25450142191314  
H -3.10626124820812 0.81602663593019 -1.28288956335809  
As 0.06806287564966 0.90454990428276 -0.27543796324509  
H 0.19482595849590 1.03366655671464 1.25355298107699  
 $\Delta G = -4315.22512471$  Eh  
 $\Delta H = -4315.19340419$  Eh  
ZPE = 0.02147752 Eh

---

#### (OH)<sub>2</sub>GeAsOH

Ge -2.095383425 0.915649877 -0.160414892  
O -3.064728645 1.478737250 1.229278791  
O -3.306451043 1.003338966 -1.493244410  
H -3.977541697 1.644133815 0.931242180  
H -2.951752251 0.684485736 -2.339875367  
As 0.158102036 0.311044939 -0.194720684  
O 0.472700686 0.449291542 1.610933606  
H 0.706406340 1.372139875 1.806087776  
 $\Delta G = -4541.07929397$  Eh  
 $\Delta H = -4541.03585640$  Eh  
ZPE = 0.04028669 Eh

---

#### (NH<sub>2</sub>)<sub>2</sub>GeAsNH<sub>2</sub>

Ge -2.109713176 0.974533432 -0.273595400  
N -2.996714316 1.486156311 1.249081525  
N -3.416593398 0.857313195 -1.565593861  
H -3.890120983 1.023794818 1.411629324  
H -2.381964031 1.377702778 2.058032045  
H -3.083489991 0.782783965 -2.524186901  
H -4.145639891 1.567019405 -1.505640012  
As 0.168006039 0.636719728 -0.279138274  
N 0.138211917 0.861397724 1.643879869  
H 0.739808005 1.649718606 1.887782256  
H 0.536990824 0.026922039 2.077082427  
 $\Delta G = -4481.38794546$  Eh  
 $\Delta H = -4481.34447105$  Eh  
ZPE = 0.07649437 Eh

---

#### F<sub>2</sub>GeAsF

Ge -2.16679799995884 0.91922152096848 -0.08567346514250  
F -3.20219480146125 1.03722547430712 1.31118540147531  
F -3.28816129680084 0.80621243611686 -1.42067389198349  
As 0.14071599531221 0.89710740194116 -0.32399075759597  
F 0.52803210290872 1.04508116666637 1.40977571324665  
 $\Delta G = -4613.20402609$  Eh  
 $\Delta H = -4613.16294519$  Eh  
ZPE = 0.00667234 Eh

---

#### Cl<sub>2</sub>GeAsCl

Ge -2.11460913536193 0.91440634267960 -0.16800679090870  
Cl -3.23736583774612 1.05985236663778 1.65780531452945  
Cl -3.48954922671050 0.77665944813549 -1.82463226293839  
As 0.16396792776369 0.88989912042355 -0.45569947964057  
Cl 0.68914927205486 1.06402972212358 1.68115721895820  
 $\Delta G = -5694.36763237$  Eh  
 $\Delta H = -5694.32299242$  Eh

---

ZPE = 0.00447835 Eh

---

#### Br<sub>2</sub>GeAsBr

Ge -2.10228311964563 0.91308372107267 -0.18548459111980  
Br -3.27601166684166 1.06781780171255 1.78991814695283  
Br -3.55897569709250 0.76190950849240 -1.97652255233194  
As 0.16917838567713 0.88966570461974 -0.50726845831829  
Br 0.77968509790266 1.07237126410264 1.76998045481720  
 $\Delta G = -12036.90268540$  Eh  
 $\Delta H = -12036.85417706$  Eh  
ZPE = 0.00341743 Eh

---

#### (OH)<sub>2</sub>GeAsCN

Ge -1.162759000 0.250645000 -0.915206000  
As 0.962817000 -0.615261000 -0.984452000  
O -2.367663000 0.050838000 0.391546000  
O -2.030943000 1.250477000 -2.088006000  
C 1.226801000 0.193663000 -2.686782000  
N 1.510994000 0.637968000 -3.731287000  
H -2.041668000 -0.491994000 1.129274000  
H -2.925742000 1.444970000 -1.752970000  
 $\Delta G = -4558.10052268$  Eh  
 $\Delta H = -4558.05602359$  Eh  
ZPE = 0.03521990 Eh

---

#### (OH)<sub>2</sub>GeAsBr

Ge -1.879545000 0.730302000 -0.657939000  
O -2.742514000 0.699600000 0.903822000  
H -2.093257000 0.570416000 1.621908000  
O -3.173239000 0.967583000 -1.856106000  
H -4.034786000 1.025502000 -1.404874000  
As 0.376297000 0.511086000 -1.029107000  
Br 0.766190000 0.282179000 1.343525000  
 $\Delta G = -7039.69572504$  Eh  
 $\Delta H = -7039.65156817$  Eh  
ZPE = 0.02839663 Eh

---

#### (CH<sub>3</sub>)<sub>2</sub>GeAsBr

Ge -1.951428000 0.885610000 -0.529998000  
C -2.774221000 0.835202000 1.250458000  
H -3.563113000 0.072459000 1.267773000  
H -2.007544000 0.595301000 1.994159000  
H -3.220149000 1.812461000 1.475282000  
C -3.220286000 1.312173000 -1.976493000  
H -2.706648000 1.326132000 -2.943592000  
H -4.017523000 0.558068000 -1.999209000  
H -3.671905000 2.295129000 -1.790491000  
As 0.236139000 0.508780000 -1.014338000  
Br 0.995266000 0.083997000 1.219807000  
 $\Delta G = -6967.74696084$  Eh  
 $\Delta H = -6967.69959932$  Eh  
ZPE = 0.07246053 Eh

---

#### (CH<sub>3</sub>)<sub>2</sub>GeAsCN

Ge -1.727079000 0.834497000 -1.299715000  
C -1.503902000 0.868802000 0.645082000

H -2.183329000 0.136544000 1.100268000  
H -0.466472000 0.625655000 0.896071000  
H -1.758701000 1.867865000 1.021783000  
C -3.547611000 1.251572000 -1.910364000  
H -3.602241000 1.214438000 -3.003295000  
H -4.252206000 0.525826000 -1.483802000  
H -3.829391000 2.254332000 -1.563677000  
As -0.090505000 0.366084000 -2.812162000  
C 1.168069000 0.113917000 -1.399251000  
N 1.974857000 -0.051110000 -0.567346000  
 $\Delta G = -4486.15642016$  Eh  
 $\Delta H = -4486.10940171$  Eh  
ZPE = 0.07958371 Eh

---

## 2 IMAGES

Below, we provide a complete set of figures describing geometries found with different methodologies, contour maps of the electron density, contour maps of the Laplacian of electron density, contour maps of the electron localization function of the electron density, and contour of deformation densities by means of eigenvalues for the  $R_2Ge=AsR$  compounds.

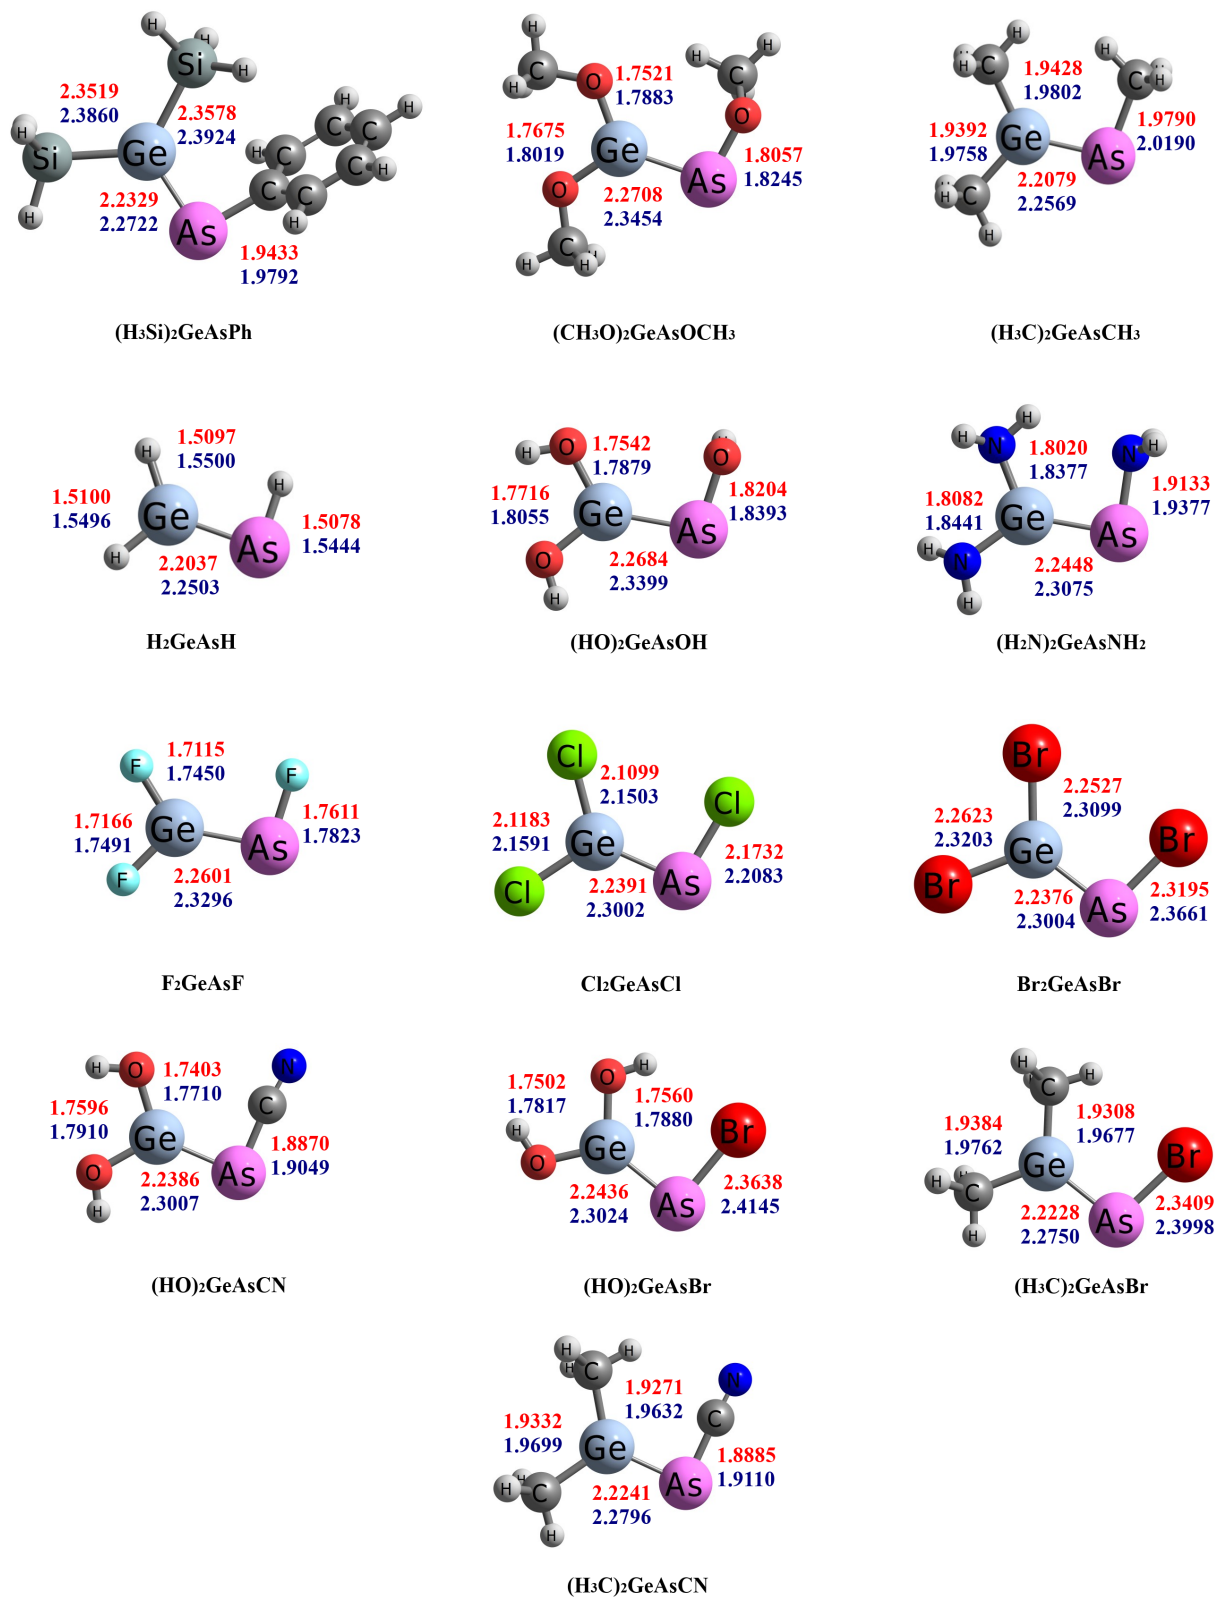

**Fig. 1** Molecular structures of R<sub>2</sub>Ge=AsR compounds. All the values represent the bond lengths (Å), red values from ZORA-RI-MP2/Def2-TZVPP (full-electron) methods, and blue values from RI-BP86-D3BJ/Def2-TZVPP methods. All RI methods employ the same Def2-TZVPP basis set to treat the Coulomb part.

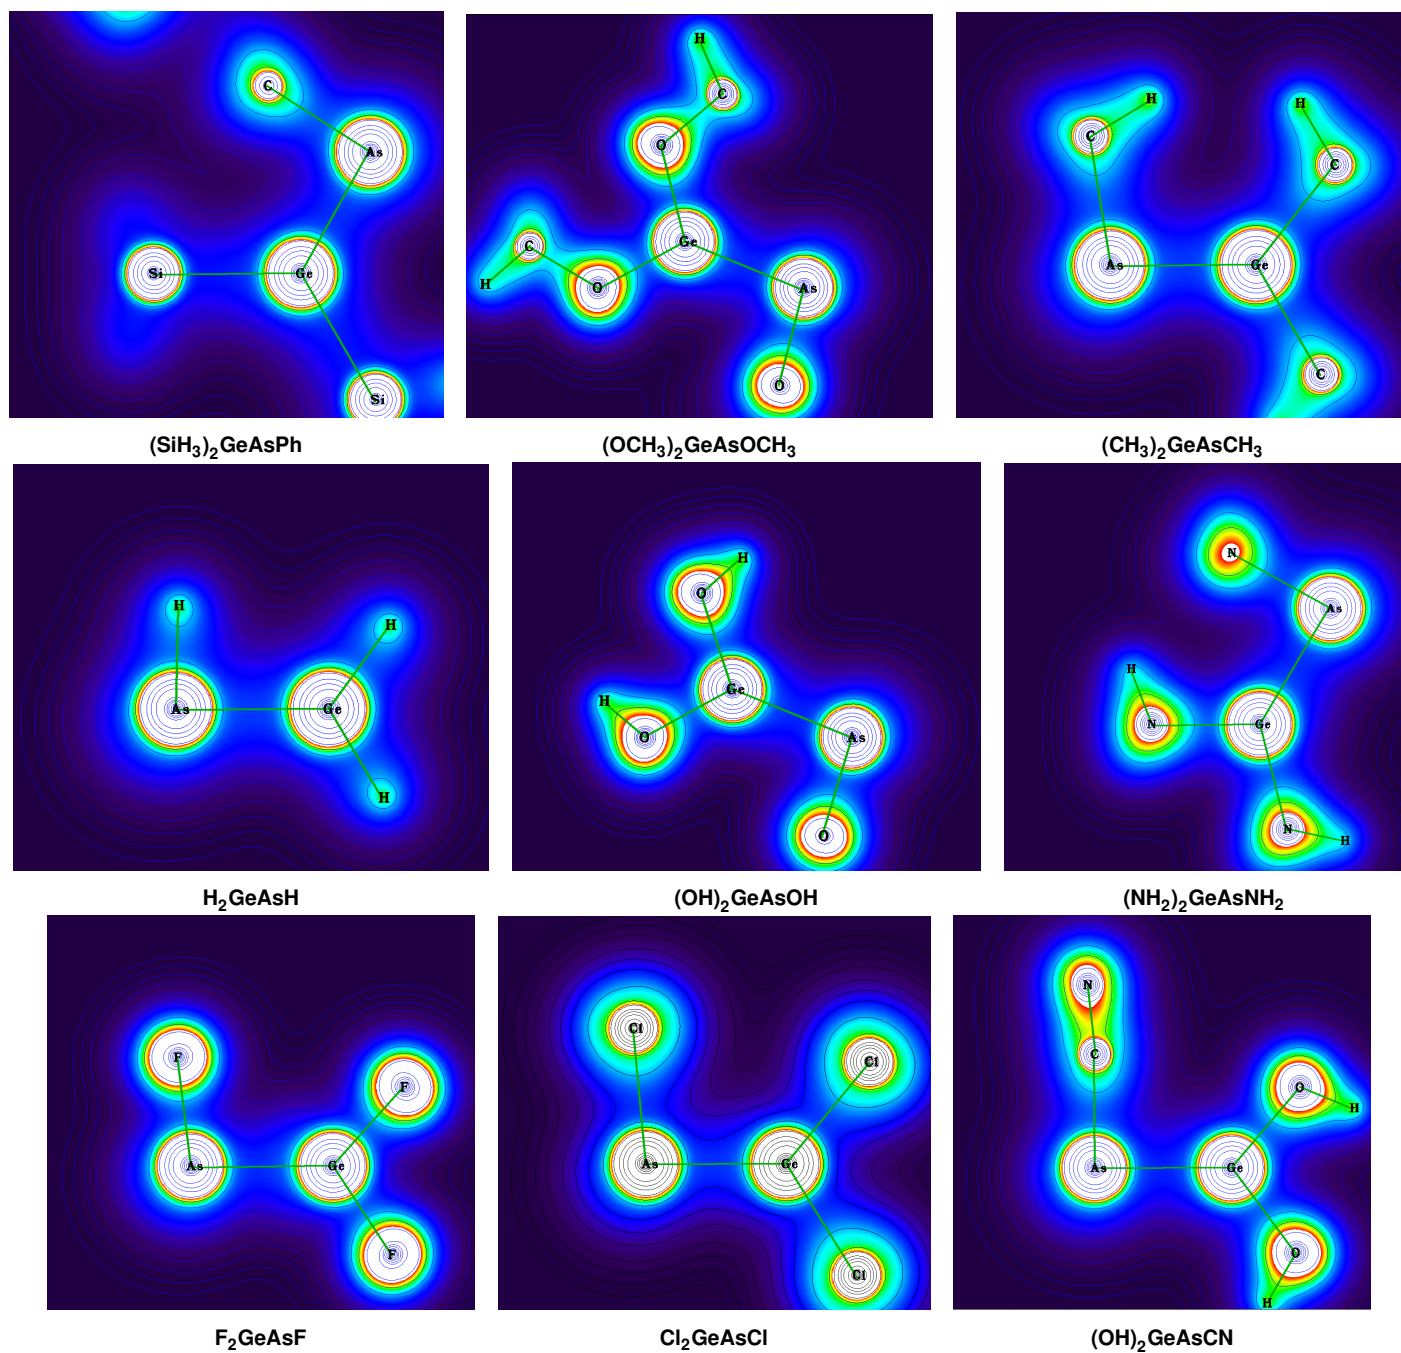

**Fig. 2** Contour maps of the electron density ( $\rho(r)$ ) for  $\text{R}_2\text{Ge}=\text{AsR}$  compounds. Green lines indicate the bond between atoms.

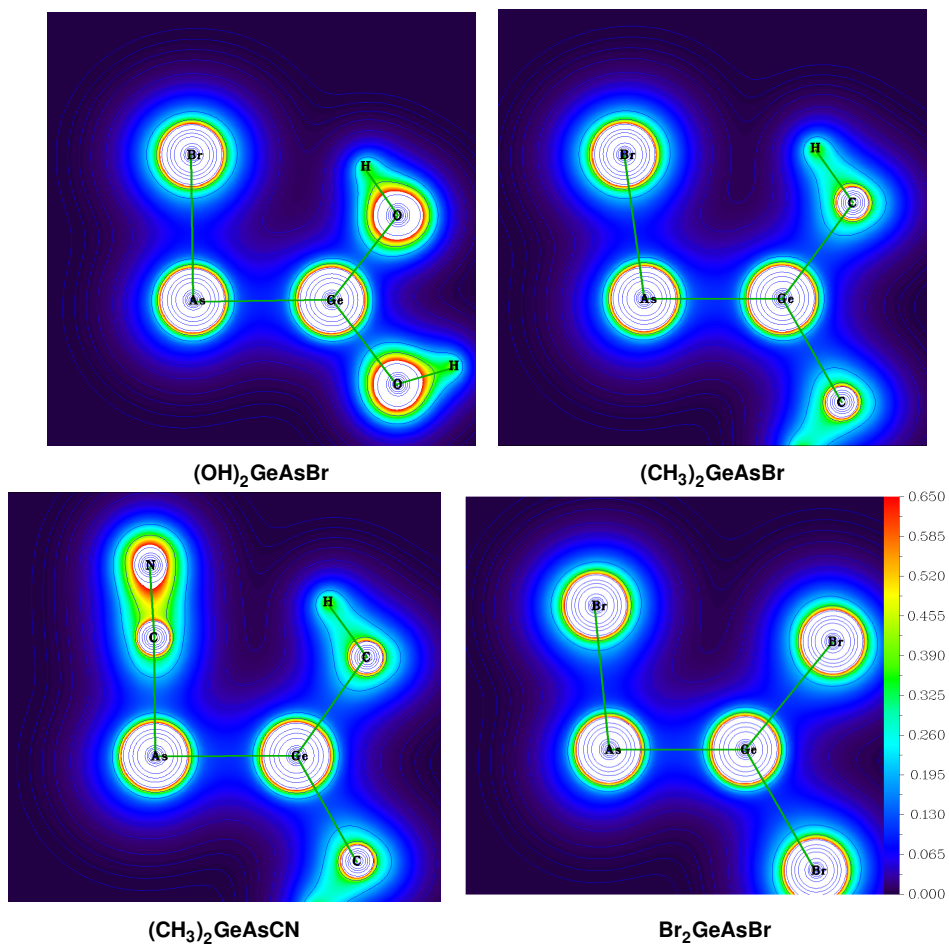

**Fig. 3** Contour maps of the electron density ( $\rho(r)$ ) for  $R_2Ge=AsR$  compounds. Green lines indicate the bond between atoms.

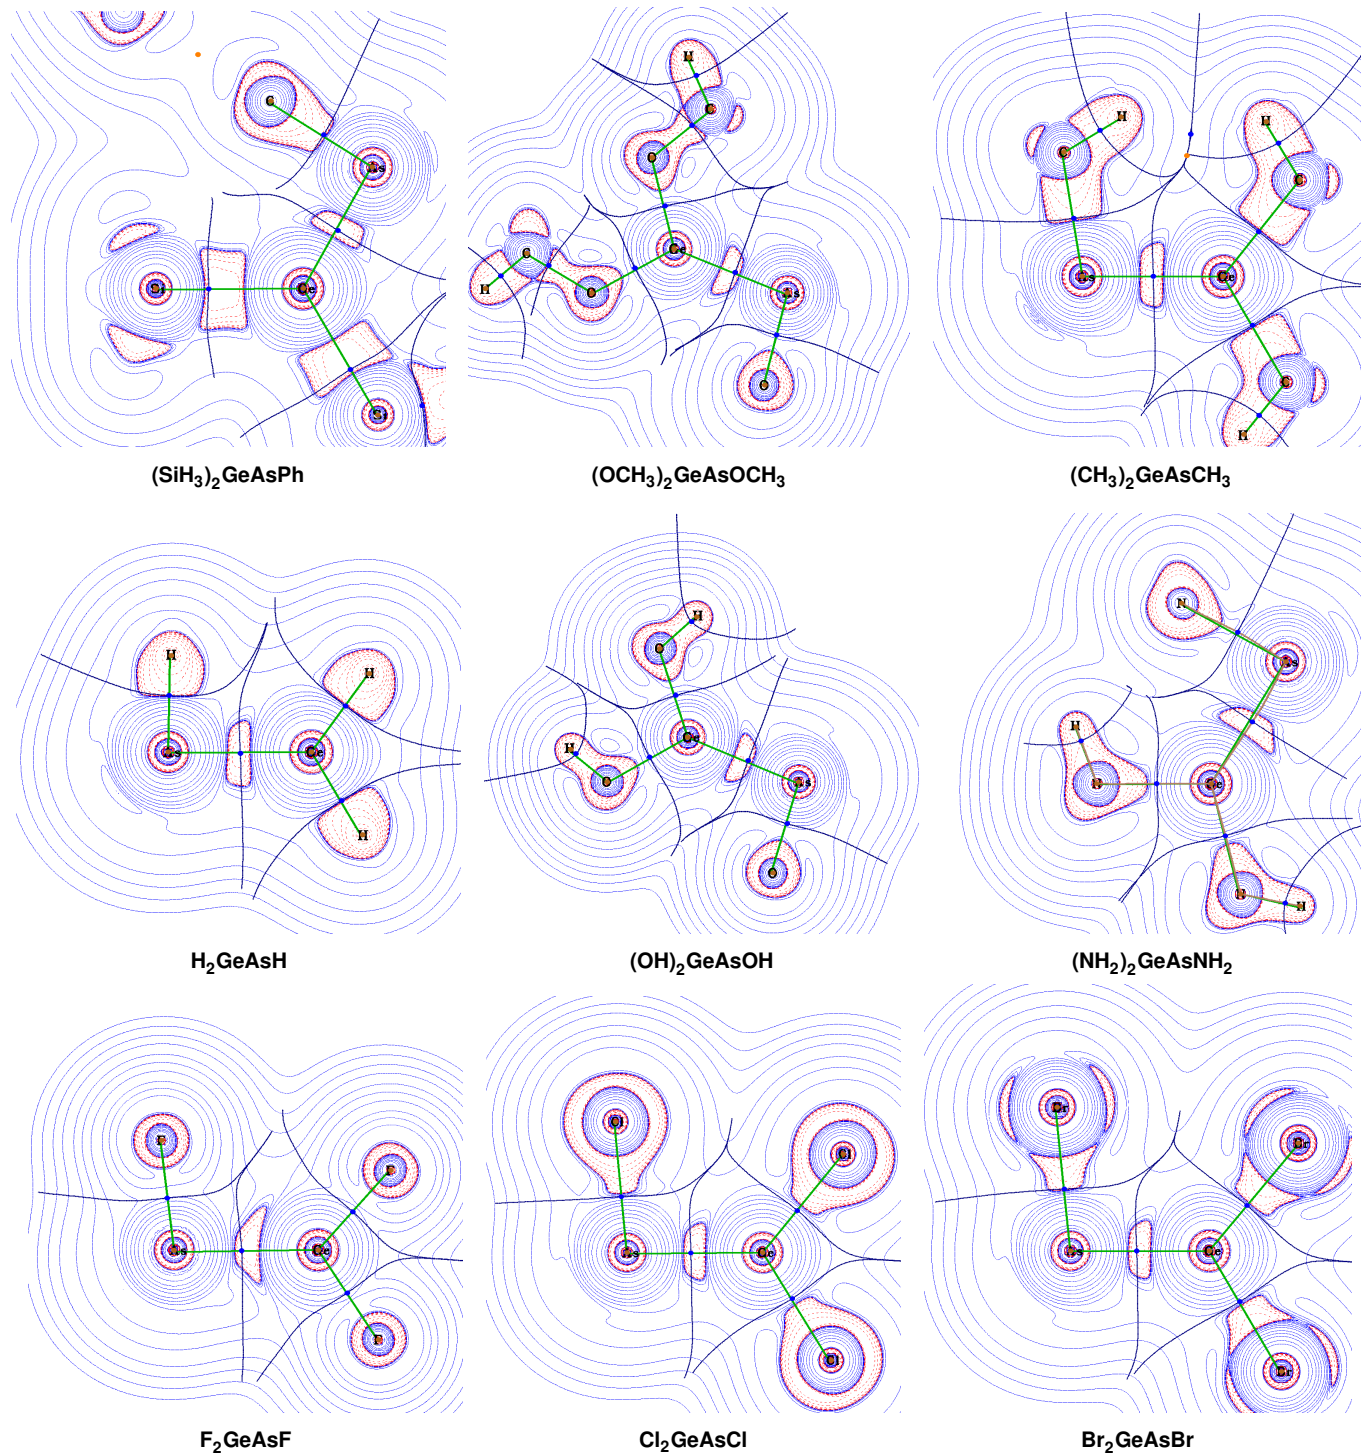

**Fig. 4** Contour maps of the Laplacian of electron density ( $\nabla^2\rho(r)$ ) for  $R_2Ge=AsR$  compounds. The blue lines refer to  $\nabla^2\rho(r) > 0$ , and the red lines indicate  $\nabla^2\rho(r) < 0$ . Green lines indicate the bond between atoms, blue dots between them are the bond critical point (BCP), bold blue lines indicate the border of interbasin regions.

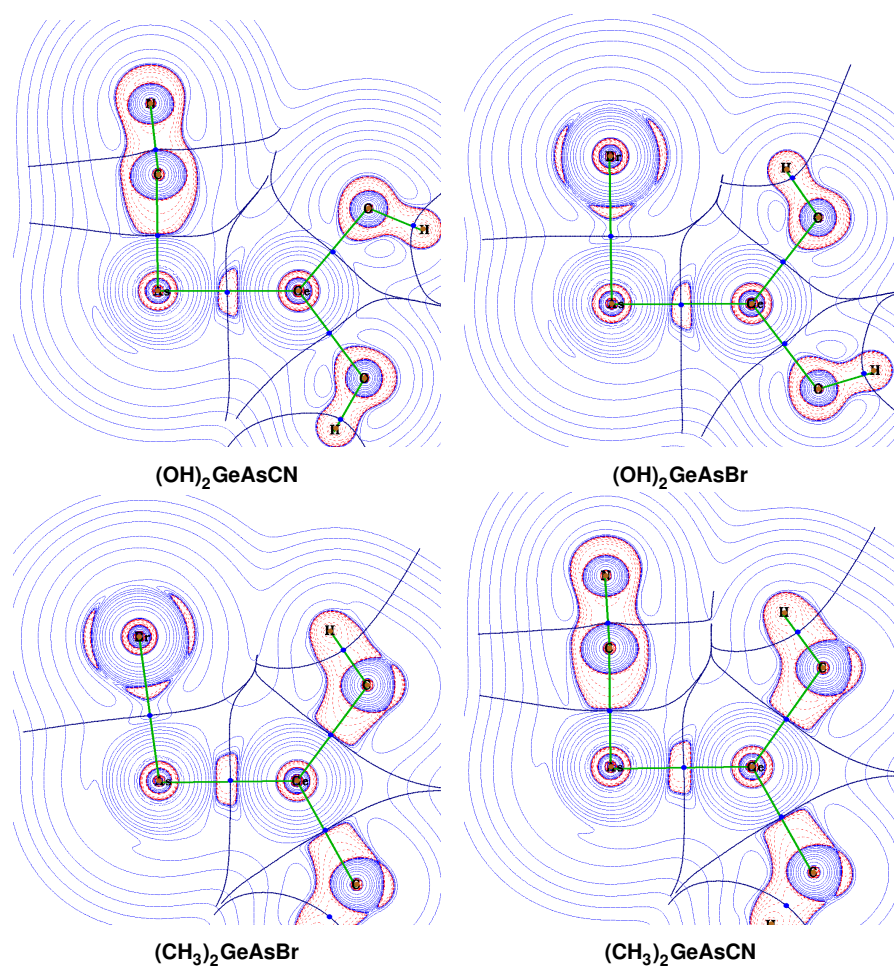

**Fig. 5** Contour maps of the Laplacian of electron density ( $\nabla^2\rho(r)$ ) for  $R_2Ge=AsR$  compounds. The blue lines refer to  $\nabla^2\rho(r) > 0$ , and the red lines indicate  $\nabla^2\rho(r) < 0$ . Green lines indicate the bond between atoms, blue dots between them are the bond critical point (BCP), bold blue lines indicate the border of interbasin regions.



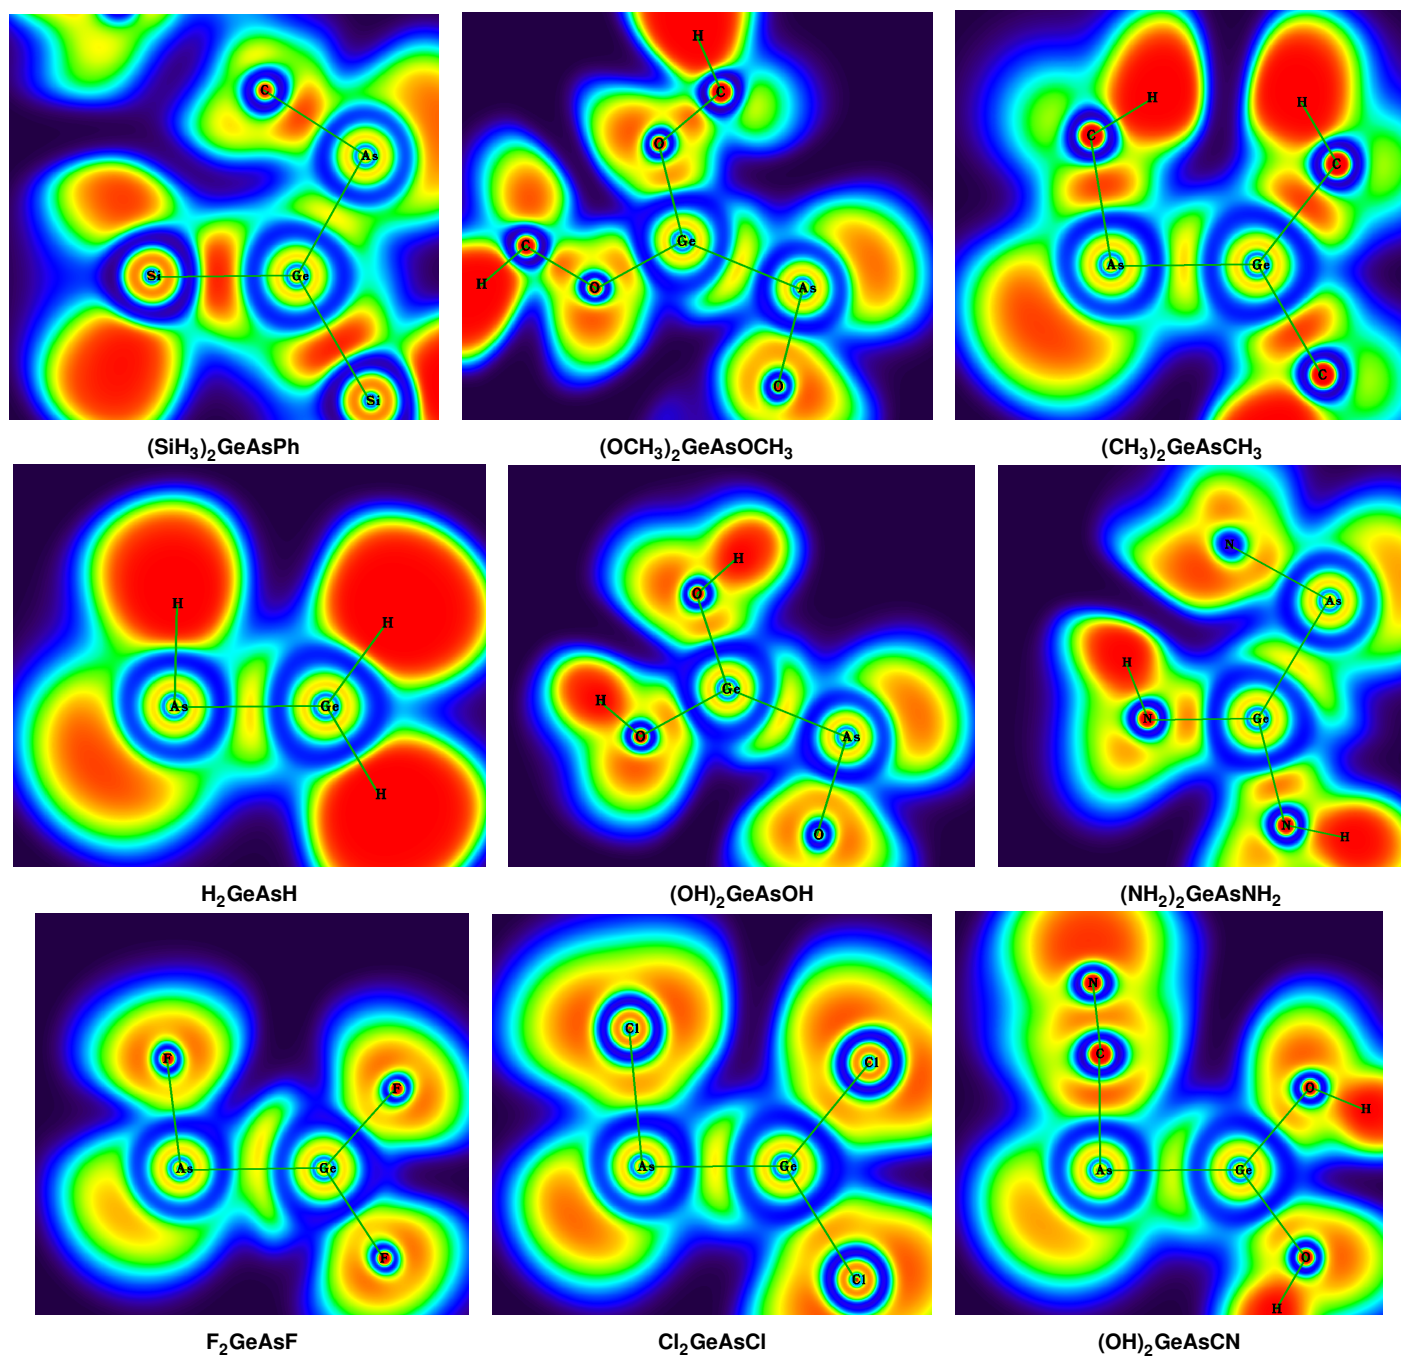

Fig. 6 Contour maps of the electron localization function (ELF) of the electron density for  $R_2Ge=AsR$  compounds.

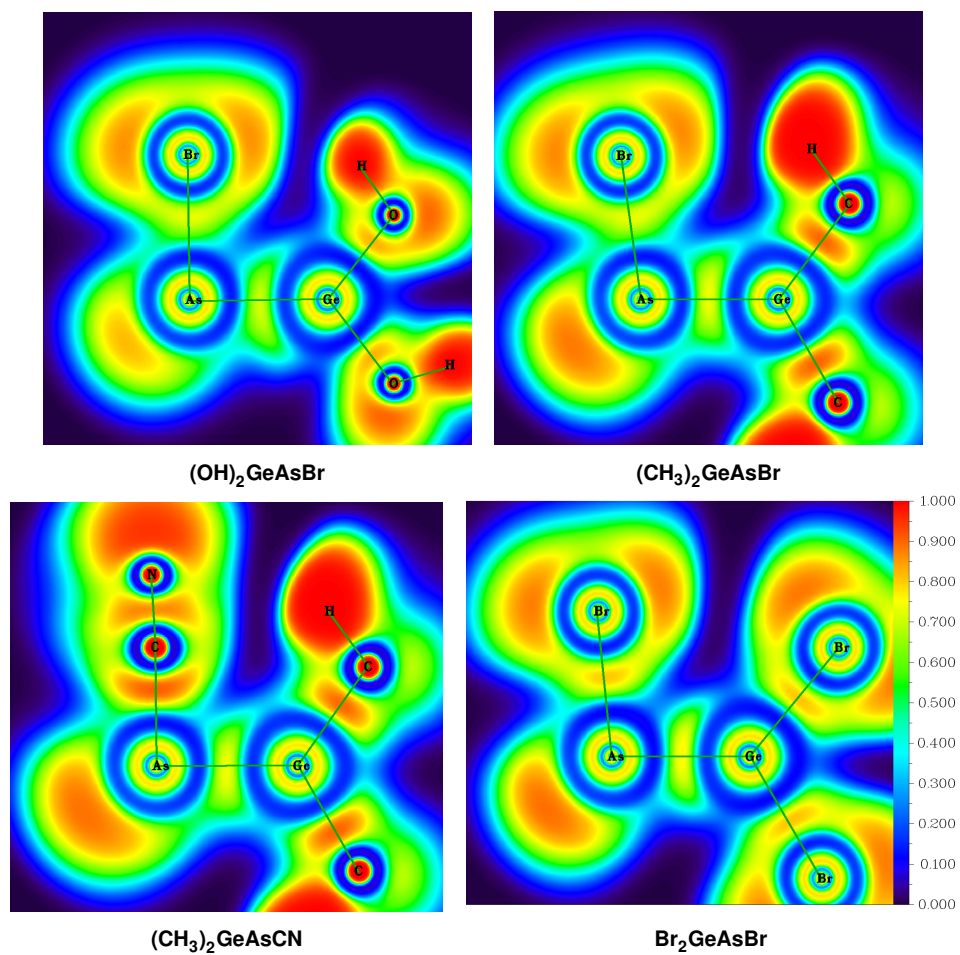

**Fig. 7** Contour maps of the electron localization function (ELF) of the electron density for  $R_2Ge=AsR$  compounds.

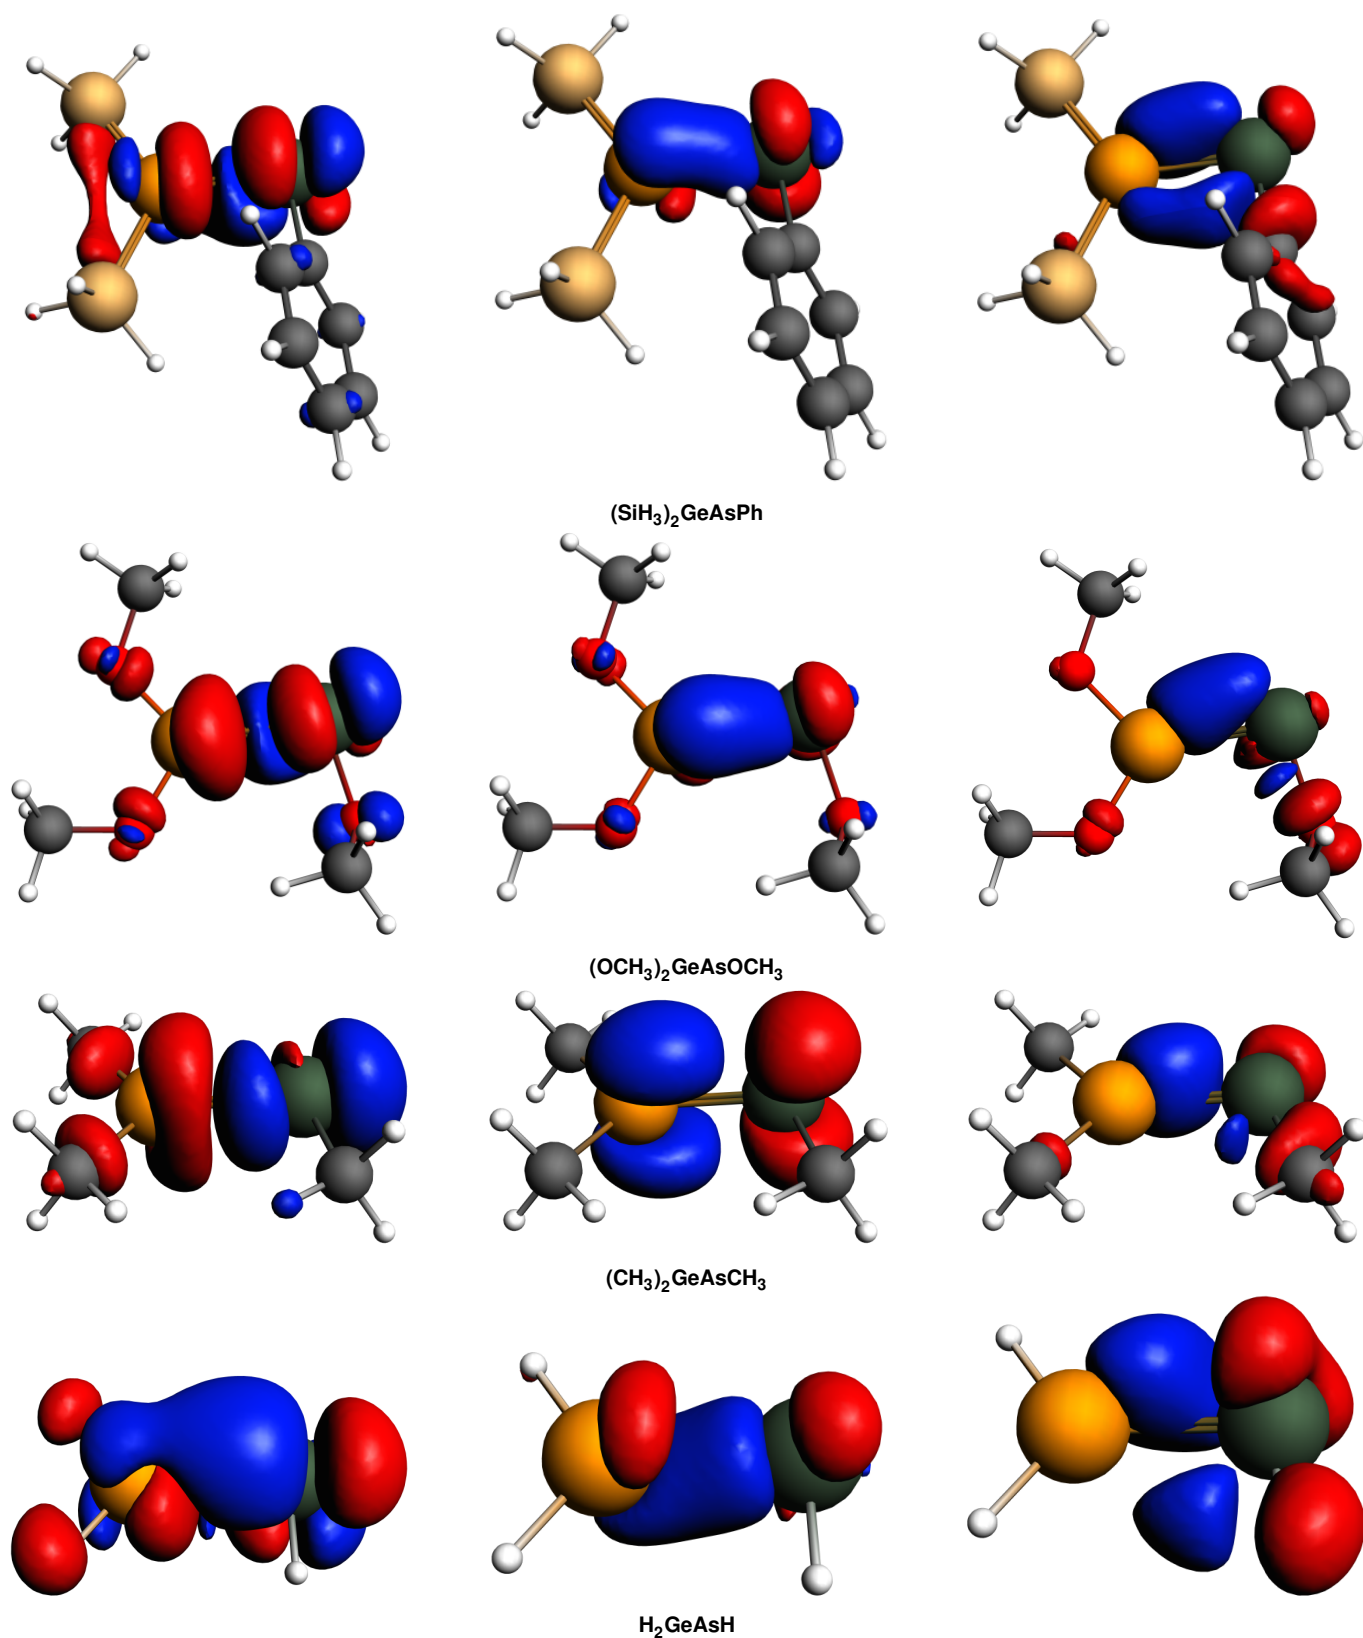

**Fig. 8** Contours of deformation densities describing the  $\text{R}_2\text{Ge}=\text{AsR}$  interactions by means of  $\Delta\rho(r)$  eigenvalues. Left, center, and right images denote the  $\Delta\rho_1$ ,  $\Delta\rho_2$ , and  $\Delta\rho_3$  eigenchannels for each compound, respectively. Red surfaces indicate density outflow and blue surfaces density inflow (contour value 0.003 a.u.).

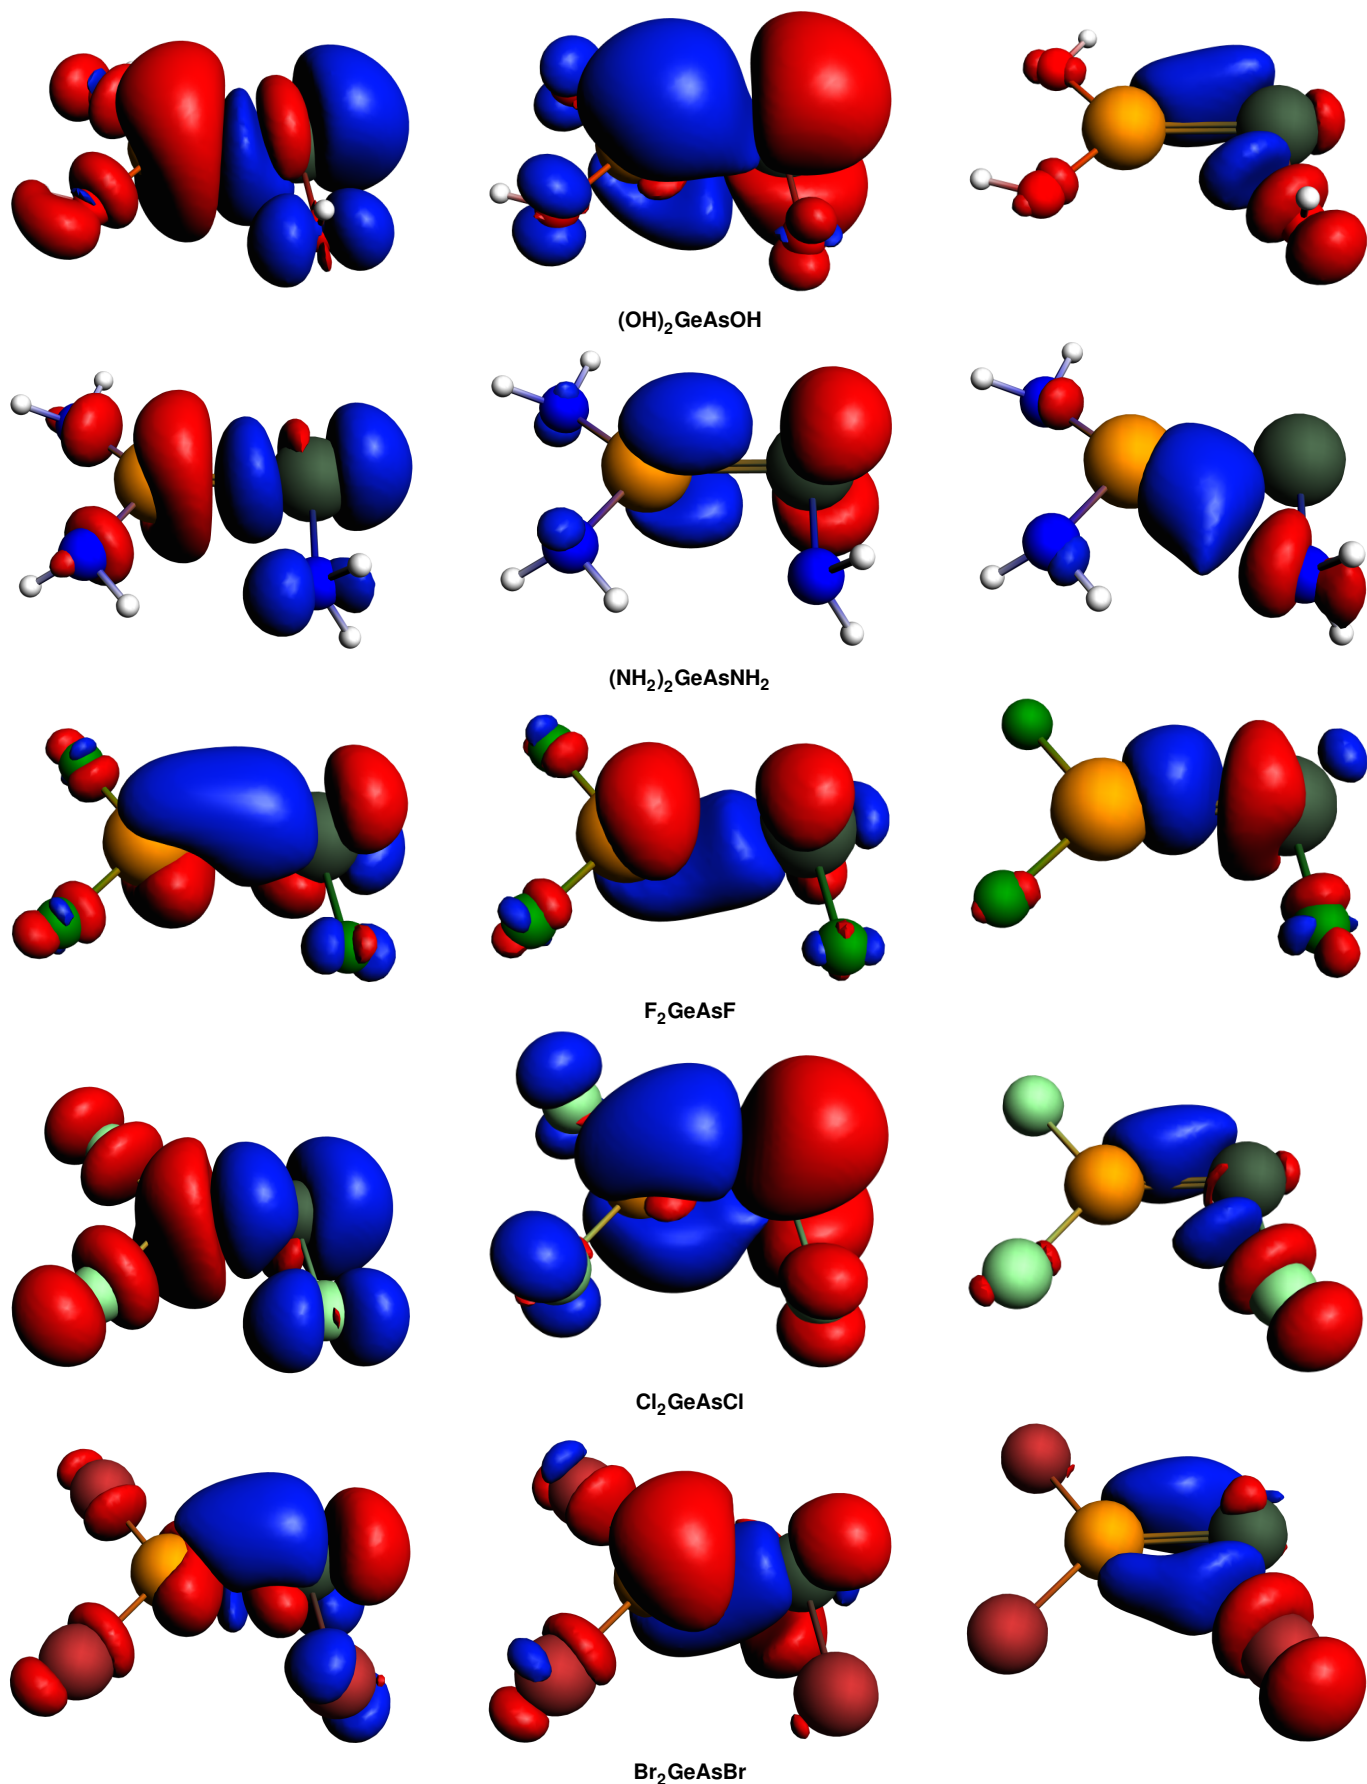

**Fig. 9** Contours of deformation densities describing the  $\text{R}_2\text{Ge}=\text{AsR}$  interactions by means of  $\Delta\rho(r)$  eigenvalues. Left, center, and right images denote the  $\Delta\rho_1$ ,  $\Delta\rho_2$ , and  $\Delta\rho_3$  eigenchannels for each compound, respectively. Red surfaces indicate density outflow and blue surfaces density inflow (contour value 0.003 a.u.).

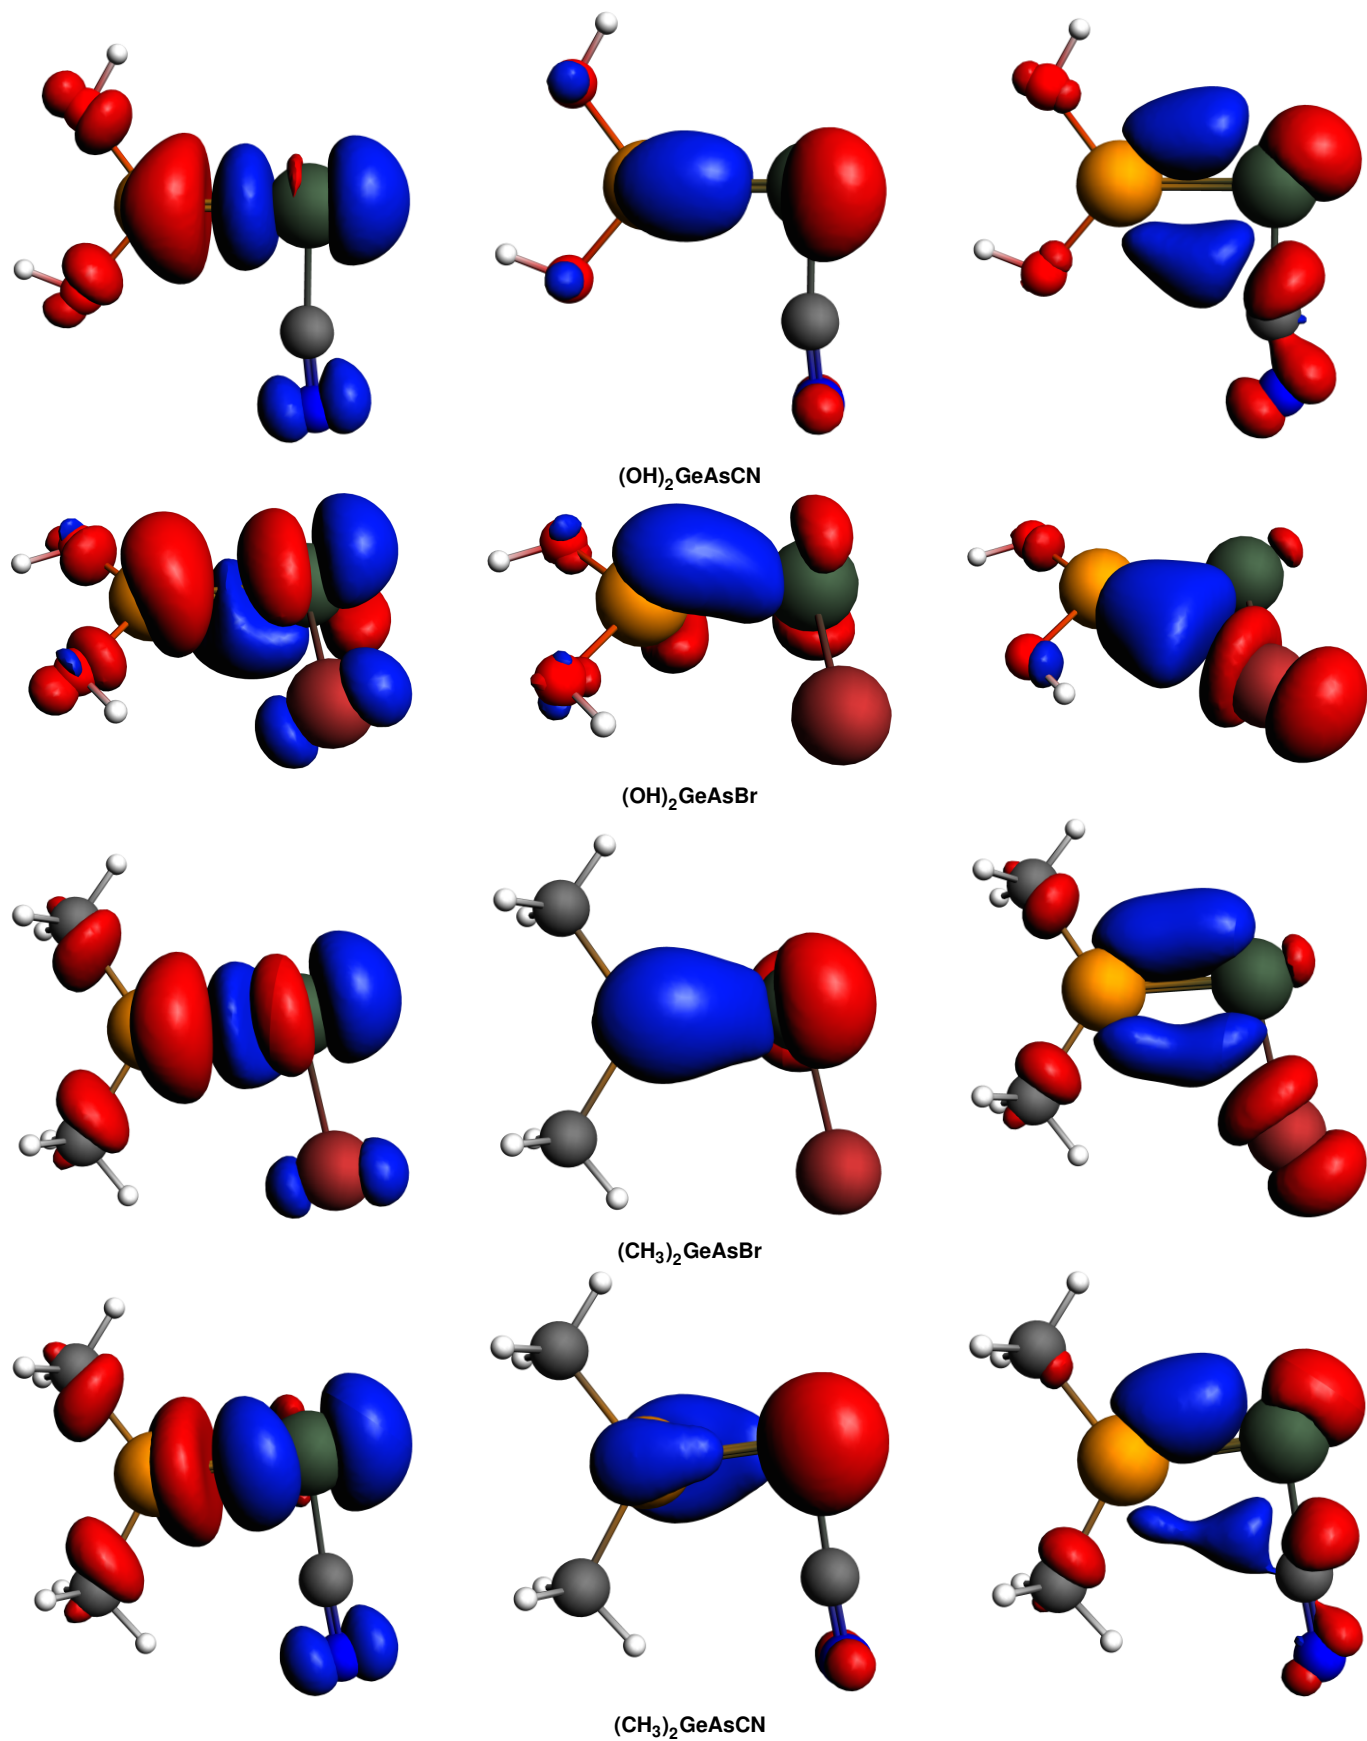

**Fig. 10** Contours of deformation densities describing the  $R_2Ge=AsR$  interactions by means of  $\Delta\rho(r)$  eigenvalues. Left, center, and right images denote the  $\Delta\rho_1$ ,  $\Delta\rho_2$ , and  $\Delta\rho_3$  eigenchannels for each compound, respectively. Red surfaces indicate density outflow and blue surfaces density inflow (contour value 0.003 a.u.).

### 3 TABLE

Below, we provide a table with the energetic EDA-NOCV analysis for the C and D cases.

**Table 1** EDA-NOCV of interaction at  $R_2\text{Ge}=\text{AsR}$  bond, using BP86-D3BJ/TZ2P as level of theory. The First part (anionic specie as Ge fragment, cationic specie as As fragment **C**), and second part (anionic specie as As fragment, cationic specie as Ge fragment **D**).

|                                  | ( $\text{SiH}_3$ ) <sub>2</sub> GeAsPh | ( $\text{OCH}_3$ ) <sub>2</sub> GeAsOCH <sub>3</sub> | ( $\text{CH}_3$ ) <sub>2</sub> GeAsCH <sub>3</sub> | H <sub>2</sub> GeAsH | (OH) <sub>2</sub> GeAsOH | (NH <sub>2</sub> ) <sub>2</sub> GeAsNH <sub>2</sub> | F <sub>2</sub> GeAsF | Cl <sub>2</sub> GeAsCl | Br <sub>2</sub> GeAsBr | (OH) <sub>2</sub> GeAsCN | (OH) <sub>2</sub> GeAsBr | (CH <sub>3</sub> ) <sub>2</sub> GeAsBr | (CH <sub>3</sub> ) <sub>2</sub> GeAsCN |
|----------------------------------|----------------------------------------|------------------------------------------------------|----------------------------------------------------|----------------------|--------------------------|-----------------------------------------------------|----------------------|------------------------|------------------------|--------------------------|--------------------------|----------------------------------------|----------------------------------------|
| <b>C<sup>d</sup></b>             |                                        |                                                      |                                                    |                      |                          |                                                     |                      |                        |                        |                          |                          |                                        |                                        |
| <sup>a</sup> ΔE <sup>int</sup>   | -232.77                                | -232.78                                              | -274.90                                            | -287.47              | -243.59                  | -256.18                                             | -240.55              | -230.60                | -223.18                | -280.64                  | -256.36                  | -278.03                                | -307.82                                |
| <sup>a</sup> ΔE <sup>Pauli</sup> | 309.44                                 | 223.28                                               | 412.09                                             | 378.53               | 198.27                   | 253.98                                              | 234.87               | 199.97                 | 196.22                 | 210.73                   | 290.14                   | 333.49                                 | 396.39                                 |
| <sup>a</sup> ΔE <sup>elst</sup>  | -254.68                                | -207.50                                              | -313.42                                            | -301.84              | -198.86                  | -234.76                                             | -202.38              | -186.88                | -178.97                | -211.28                  | -234.95                  | -289.96                                | -315.52                                |
| <sup>a</sup> ΔE <sup>stab</sup>  | -277.04                                | -243.21                                              | -368.43                                            | -361.35              | -239.40                  | -270.68                                             | -270.16              | -238.32                | -234.00                | -275.71                  | -306.58                  | -315.93                                | -383.21                                |
| <sup>a</sup> ΔE <sup>disp</sup>  | -10.48                                 | -5.35                                                | -5.13                                              | -2.81                | -3.59                    | -4.72                                               | -2.89                | -5.37                  | -6.42                  | -4.39                    | -4.97                    | -5.63                                  | -5.48                                  |
| <b>D<sup>d</sup></b>             |                                        |                                                      |                                                    |                      |                          |                                                     |                      |                        |                        |                          |                          |                                        |                                        |
| <sup>a</sup> ΔE <sup>int</sup>   | -240.57                                | -236.06                                              | -242.76                                            | -268.98              | -256.05                  | -225.32                                             | -273.82              | -242.69                | -231.15                | -223.26                  | -238.70                  | -224.43                                | -212.47                                |
| <sup>a</sup> ΔE <sup>Pauli</sup> | 335.03                                 | 351.28                                               | 359.5                                              | 413.51               | 361.13                   | 317.10                                              | 314.56               | 279.20                 | 286.01                 | 336.84                   | 293.83                   | 224.43                                 | 389.12                                 |
| <sup>a</sup> ΔE <sup>elst</sup>  | -233.87                                | -276.88                                              | -244.7                                             | -314.3               | -299.77                  | -238.06                                             | -267.67              | -214.65                | -219.88                | -260.25                  | -221.78                  | -303.09                                | -277.35                                |
| <sup>a</sup> ΔE <sup>stab</sup>  | -331.26                                | -305.12                                              | -352.43                                            | -365.38              | -313.82                  | -299.64                                             | -317.83              | -301.92                | -290.86                | -295.46                  | -305.79                  | -335.30                                | -318.76                                |
| <sup>a</sup> ΔE <sup>disp</sup>  | -10.48                                 | -5.35                                                | -5.13                                              | -2.81                | -3.59                    | -4.72                                               | -2.89                | -5.37                  | -6.42                  | -4.39                    | -4.97                    | -5.63                                  | -5.48                                  |

<sup>a</sup> All values are reported in kcal.mol<sup>-1</sup>;
